# Supplementary material for: Body Fat Plays an Important Role in of Bioimpedance Spectroscopy-Based Dry Weight Measurement Error for Patients with Hemodialysis
Source: MDPI journal article supplement (doi:10.3390/diagnostics11101907), 2021-10-15
Supplement: s1 [file s1]

**Table S1. Comparison between negative and positive groups in each of the same absolute degree of differences.**

| Group                     | Pair T-test                                                               |                                                                                |                                                               |
|---------------------------|---------------------------------------------------------------------------|--------------------------------------------------------------------------------|---------------------------------------------------------------|
|                           | 0kg < DW <sub>CP-BIS</sub> < 1kg<br>Vs. -1kg < DW <sub>CP-BIS</sub> < 0kg | 1kg ≤ DW <sub>CP-BIS</sub> < 2kg<br>Vs. -2kg < DW <sub>CP-BIS</sub> ≤ -<br>0kg | 2kg ≤ DW <sub>CP-BIS</sub><br>Vs. -2kg ≤ DW <sub>CP-BIS</sub> |
| Feature                   | p-value                                                                   | p-value                                                                        | p-value                                                       |
| Age                       | 0.00539                                                                   | 0.308495                                                                       | 0.105076                                                      |
| Gender(%)                 | 0.005076                                                                  | 0.468948                                                                       | 0.333599                                                      |
| Height (cm)               | 0.000101                                                                  | 0.016801                                                                       | 0.015952                                                      |
| Weight (kg)               | 0.231582                                                                  | 0.052842                                                                       | 2.30E-08                                                      |
| Vintage of HD<br>(day)    | 0.095355                                                                  | 0.523764                                                                       | 0.938017                                                      |
| DM                        | 0.065993                                                                  | 0.273175                                                                       | 1                                                             |
| HTN(%)                    | 0.178249                                                                  | 0.367704                                                                       | 0.607181                                                      |
| Hb (g/dL)                 | 0.244155                                                                  | 0.289652                                                                       | 0.000146                                                      |
| Total Protein<br>(g/dL)   | 0.188359                                                                  | 0.067745                                                                       | 0.001999                                                      |
| Albumin (g/dL)            | 0.047522                                                                  | 0.094349                                                                       | 0.046939                                                      |
| BUN (mg/dL)               | 0.653583                                                                  | 0.032601                                                                       | 0.011525                                                      |
| Cr (mg/dL)                | 0.866093                                                                  | 0.004409                                                                       | 0.020969                                                      |
| Tca (mg/dL)               | 0.984873                                                                  | 0.579089                                                                       | 0.490851                                                      |
| P (mg/dL)                 | 0.428641                                                                  | 1.46E-05                                                                       | 0.081678                                                      |
| Na (mEq/L)                | 0.912956                                                                  | 0.307781                                                                       | 0.899127                                                      |
| K (mEq/L)                 | 0.135443                                                                  | 0.920169                                                                       | 0.113376                                                      |
| Cl (mEq/L)                | 0.469874                                                                  | 0.76082                                                                        | 0.292536                                                      |
| TBW (L)                   | 0.558567                                                                  | 0.907086                                                                       | 0.633869                                                      |
| ECW (L)                   | 0.166276                                                                  | 0.027937                                                                       | 0.000238                                                      |
| ICW (L)                   | 0.968246                                                                  | 0.029826                                                                       | 0.000112                                                      |
| E/I                       | 0.02324                                                                   | 1.14E-05                                                                       | 4.76E-14                                                      |
| BMI (kg/m <sup>2</sup> )  | 5.20E-05                                                                  | 0.000289                                                                       | 1.45E-13                                                      |
| LTI (kg/m <sup>2</sup> )  | 0.333201                                                                  | 0.004963                                                                       | 0.000786                                                      |
| FTI (kg/m <sup>2</sup> )  | 0.001115                                                                  | 0.022047                                                                       | 1.03E-11                                                      |
| LTM (kg/m <sup>2</sup> )  | 0.728308                                                                  | 0.189777                                                                       | 0.022232                                                      |
| FAT (kg)                  | 0.011051                                                                  | 0.122354                                                                       | 2.55E-10                                                      |
| ATM (kg)                  | 0.052484                                                                  | 0.019913                                                                       | 2.58E-10                                                      |
| BCM (kg)                  | 0.950009                                                                  | 0.062997                                                                       | 0.010099                                                      |
| DW <sub>BIS</sub> (kg)    | 0.056273                                                                  | 0.001144                                                                       | 1.41E-16                                                      |
| OH(L) <sub>BIS</sub> (kg) | 0.001567                                                                  | 1.93E-10                                                                       | 2.28E-23                                                      |
| DW <sub>CP</sub> (kg)     | 0.39706                                                                   | 0.341786                                                                       | 0.022542                                                      |
| DW <sub>CP-BIS</sub> (kg) | 1.99E-162                                                                 | 1.96E-112                                                                      | 2.18E-72                                                      |
| OH(L) <sub>CP</sub> (kg)  | 0.037836                                                                  | 9.10E-07                                                                       | 2.94E-25                                                      |

Abbreviations: SD, standard deviation; HD, Hemodialysis; DM, diabetes mellitus; HTN, hypertension; Hb,

hemoglobin; BUN, blood urea nitrogen; Cr, serum creatinine; TCa, serum total calcium; P, serum phosphorus; Na,

sodium; K, serum potassium; Cl, serum chloride; TBW, total body water; ECW, extracellular water; ICW,

intracellular water; E/I, extracellular water to intracellular water ratio; BMI, body mass index; LTI, lean tissue index;

FTI, fat tissue index; lean tissue mass, LTM; FAT, fat mass; ATM, adipose tissue mass; BCM, body cell mass; DW,

dry weight; OH, overhydration.

**Table S2. Comparison between less than 1kg of GAP and more than 2kg of GAP in negative and positive group, respectively.**

| Group      | Negative                    |        |                            |        |          | Positive                   |        |                            |        |          |
|------------|-----------------------------|--------|----------------------------|--------|----------|----------------------------|--------|----------------------------|--------|----------|
|            | -1kg < DW <sub>CP-BIS</sub> |        | DW <sub>CP-BIS</sub> ≤ 2kg |        | Pair     | 0kg < DW <sub>CP-BIS</sub> |        | 2kg ≤ DW <sub>CP-BIS</sub> |        | Pair     |
|            | <0kg                        |        | (n=154)                    |        | T-test   | < 1kg                      |        | (n=246)                    |        | T-test   |
|            | (n=434)                     |        |                            |        |          | (n=405)                    |        |                            |        |          |
| Feature    | Mean                        | SD     | Mean                       | SD     | p-value  | p-value                    | SD     | Mean                       | SD     | p-value  |
| Age        | 63.76                       | 12.66  | 66.34                      | 13.17  | 0.211673 | 65.89                      | 12.18  | 63.72                      | 11.64  | 0.008188 |
| Gender(%)  | 204(47%)                    | 0.50   | 65(42%)                    | 0.50   | 0.37281  | 157(39%)                   | 0.49   | 80(33%)                    | 0.47   | 0.015267 |
| Height     |                             |        |                            |        |          |                            |        |                            |        |          |
| (cm)       | 159.88                      | 8.40   | 160.96                     | 8.25   | 0.263094 | 161.94                     | 8.03   | 163.88                     | 9.29   | 0.004188 |
| Weight     |                             |        |                            |        |          |                            |        |                            |        |          |
| (kg)       | 60.78                       | 11.47  | 64.68                      | 13.08  | 0.007522 | 59.61                      | 11.23  | 59.07                      | 10.68  | 0.497721 |
| Vintage of |                             |        |                            |        |          |                            |        |                            |        |          |
| HD (day)   | 745.55                      | 753.38 | 854.78                     | 850.92 | 0.653565 | 874.61                     | 848.06 | 833.20                     | 893.90 | 0.052677 |
| DM         | 239(55%)                    | 0.50   | 95(62%)                    | 0.49   | 0.819401 | 247(61%)                   | 0.49   | 161(65%)                   | 0.48   | 0.341385 |
| HTN(%)     | 351(81%)                    | 0.39   | 111(72%)                   | 0.45   | 0.003609 | 343(85%)                   | 0.36   | 181(74%)                   | 0.44   | 5.66E-05 |
| Hb (g/dL)  | 10.33                       | 1.44   | 10.29                      | 1.63   | 0.790732 | 10.21                      | 1.39   | 9.54                       | 1.64   | 7.61E-06 |
| Total      |                             |        |                            |        |          |                            |        |                            |        |          |
| Protein    |                             |        |                            |        |          |                            |        |                            |        |          |
| (g/dL)     | 6.41                        | 0.66   | 6.35                       | 0.72   | 0.940049 | 6.35                       | 0.66   | 6.11                       | 0.86   | 6.97E-05 |
| Albumin    |                             |        |                            |        |          |                            |        |                            |        |          |
| (g/dL)     | 3.51                        | 0.56   | 3.26                       | 0.68   | 0.054126 | 3.44                       | 0.54   | 3.13                       | 0.63   | 4.07E-09 |
| BUN        |                             |        |                            |        |          |                            |        |                            |        |          |
| (mg/dL)    | 57.68                       | 22.61  | 56.10                      | 25.18  | 0.131003 | 57.86                      | 23.17  | 52.02                      | 23.79  | 0.007318 |
| Cr (mg/dL) | 8.07                        | 3.35   | 7.40                       | 4.08   | 0.135468 | 8.08                       | 3.17   | 6.76                       | 3.26   | 5.01E-05 |
| Tca        |                             |        |                            |        |          |                            |        |                            |        |          |
| (mg/dL)    | 8.36                        | 0.76   | 8.40                       | 0.76   | 0.308357 | 8.38                       | 0.74   | 8.36                       | 0.95   | 0.757956 |
| P (mg/dL)  | 4.49                        | 1.49   | 4.32                       | 1.63   | 0.064399 | 4.38                       | 1.61   | 4.03                       | 1.47   | 0.042321 |
| Na         |                             |        |                            |        |          |                            |        |                            |        |          |
| (mEq/L)    | 137.19                      | 3.92   | 137.19                     | 4.12   | 0.689801 | 137.10                     | 4.04   | 136.89                     | 4.13   | 0.882701 |
| K (mEq/L)  | 4.73                        | 0.87   | 4.69                       | 0.97   | 0.720405 | 4.82                       | 0.89   | 4.57                       | 0.96   | 0.004298 |
| Cl (mEq/L) | 101.66                      | 5.29   | 101.73                     | 5.14   | 0.607159 | 101.27                     | 5.08   | 100.78                     | 5.00   | 0.444655 |
| TBW (L)    | 31.51                       | 7.13   | 32.72                      | 7.93   | 0.133793 | 31.64                      | 6.81   | 33.00                      | 7.67   | 0.000451 |
| ECW (L)    | 14.99                       | 3.48   | 15.16                      | 3.69   | 0.919144 | 15.24                      | 3.20   | 17.14                      | 3.92   | 1.98E-12 |
| ICW (L)    | 16.47                       | 4.10   | 17.57                      | 5.15   | 0.018393 | 16.38                      | 4.05   | 15.88                      | 4.30   | 0.76851  |
| E/I        | 0.93                        | 0.16   | 0.90                       | 0.22   | 0.056883 | 0.95                       | 0.16   | 1.11                       | 0.21   | 1.16E-19 |
| BMI        |                             |        |                            |        |          |                            |        |                            |        |          |
| (kg/m^2)   | 23.73                       | 3.75   | 24.87                      | 4.45   | 0.039558 | 22.62                      | 3.85   | 21.99                      | 3.28   | 0.399772 |
| LTI        |                             |        |                            |        |          |                            |        |                            |        |          |
| (kg/m^2)   | 13.22                       | 3.22   | 13.79                      | 4.34   | 0.081457 | 12.94                      | 3.31   | 12.38                      | 3.51   | 0.338029 |
| FTI        |                             |        |                            |        |          |                            |        |                            |        |          |
| (kg/m^2)   | 9.76                        | 4.75   | 10.74                      | 5.09   | 0.257509 | 8.74                       | 4.49   | 7.73                       | 4.23   | 0.014575 |
| LTM        |                             |        |                            |        |          |                            |        |                            |        |          |
| (kg/m^2)   | 34.31                       | 10.53  | 35.93                      | 12.74  | 0.109772 | 34.35                      | 10.39  | 33.55                      | 11.22  | 0.843426 |
| FAT (kg)   | 19.53                       | 9.64   | 22.25                      | 10.69  | 0.123561 | 17.80                      | 9.33   | 16.51                      | 9.59   | 0.138475 |
| ATM (kg)   | 22.86                       | 10.53  | 25.65                      | 12.47  | 0.040081 | 21.47                      | 10.94  | 19.04                      | 10.22  | 0.031125 |

|                      |       |       |       |       |          |       |       |       |       |          |
|----------------------|-------|-------|-------|-------|----------|-------|-------|-------|-------|----------|
| BCM (kg)             | 18.99 | 7.04  | 20.06 | 8.72  | 0.119062 | 18.89 | 7.08  | 18.10 | 7.58  | 0.77238  |
| DWBIS                |       |       |       |       |          |       |       |       |       |          |
| (kg)                 | 59.29 | 11.04 | 64.37 | 12.97 | 0.000264 | 57.62 | 10.83 | 54.69 | 10.52 | 0.048247 |
| OH(L) <sub>BIS</sub> |       |       |       |       |          |       |       |       |       |          |
| (kg)                 | 1.50  | 1.93  | 0.63  | 2.78  | 0.000307 | 1.89  | 1.78  | 4.38  | 2.70  | 1.42E-27 |
| DWCP                 |       |       |       |       |          |       |       |       |       |          |
| (kg)                 | 58.90 | 11.04 | 60.13 | 13.15 | 0.372368 | 58.04 | 10.84 | 58.85 | 10.17 | 0.055239 |
| DWCP-BIS             |       |       |       |       |          |       |       |       |       |          |
| (kg)                 | -0.40 | 0.25  | -4.24 | 2.39  | 1.19E-44 | 0.41  | 0.26  | 4.16  | 2.30  | 9.89E-71 |
| OH(L)CP              |       |       |       |       |          |       |       |       |       |          |
| (kg)                 | 1.88  | 1.97  | 4.55  | 3.51  | 1.69E-12 | 1.58  | 2.31  | 0.22  | 3.18  | 9.72E-07 |

Abbreviations: SD, standard deviation; HD, Hemodialysis; DM, diabetes mellitus; HTN, hypertension; Hb, hemoglobin; BUN, blood urea nitrogen; Cr, serum creatinine; TCa, serum total calcium; P, serum phosphorus; Na, sodium; K, serum potassium; Cl, serum chloride; TBW, total body water; ECW, extracellular water; ICW, intracellular water; E/I, extracellular water to intracellular water ratio; BMI, body mass index; LTI, lean tissue index; FTI, fat tissue index; lean tissue mass, LTM; FAT, fat mass; ATM, adipose tissue mass; BCM, body cell mass; DW, dry weight; OH, overhydration.

A

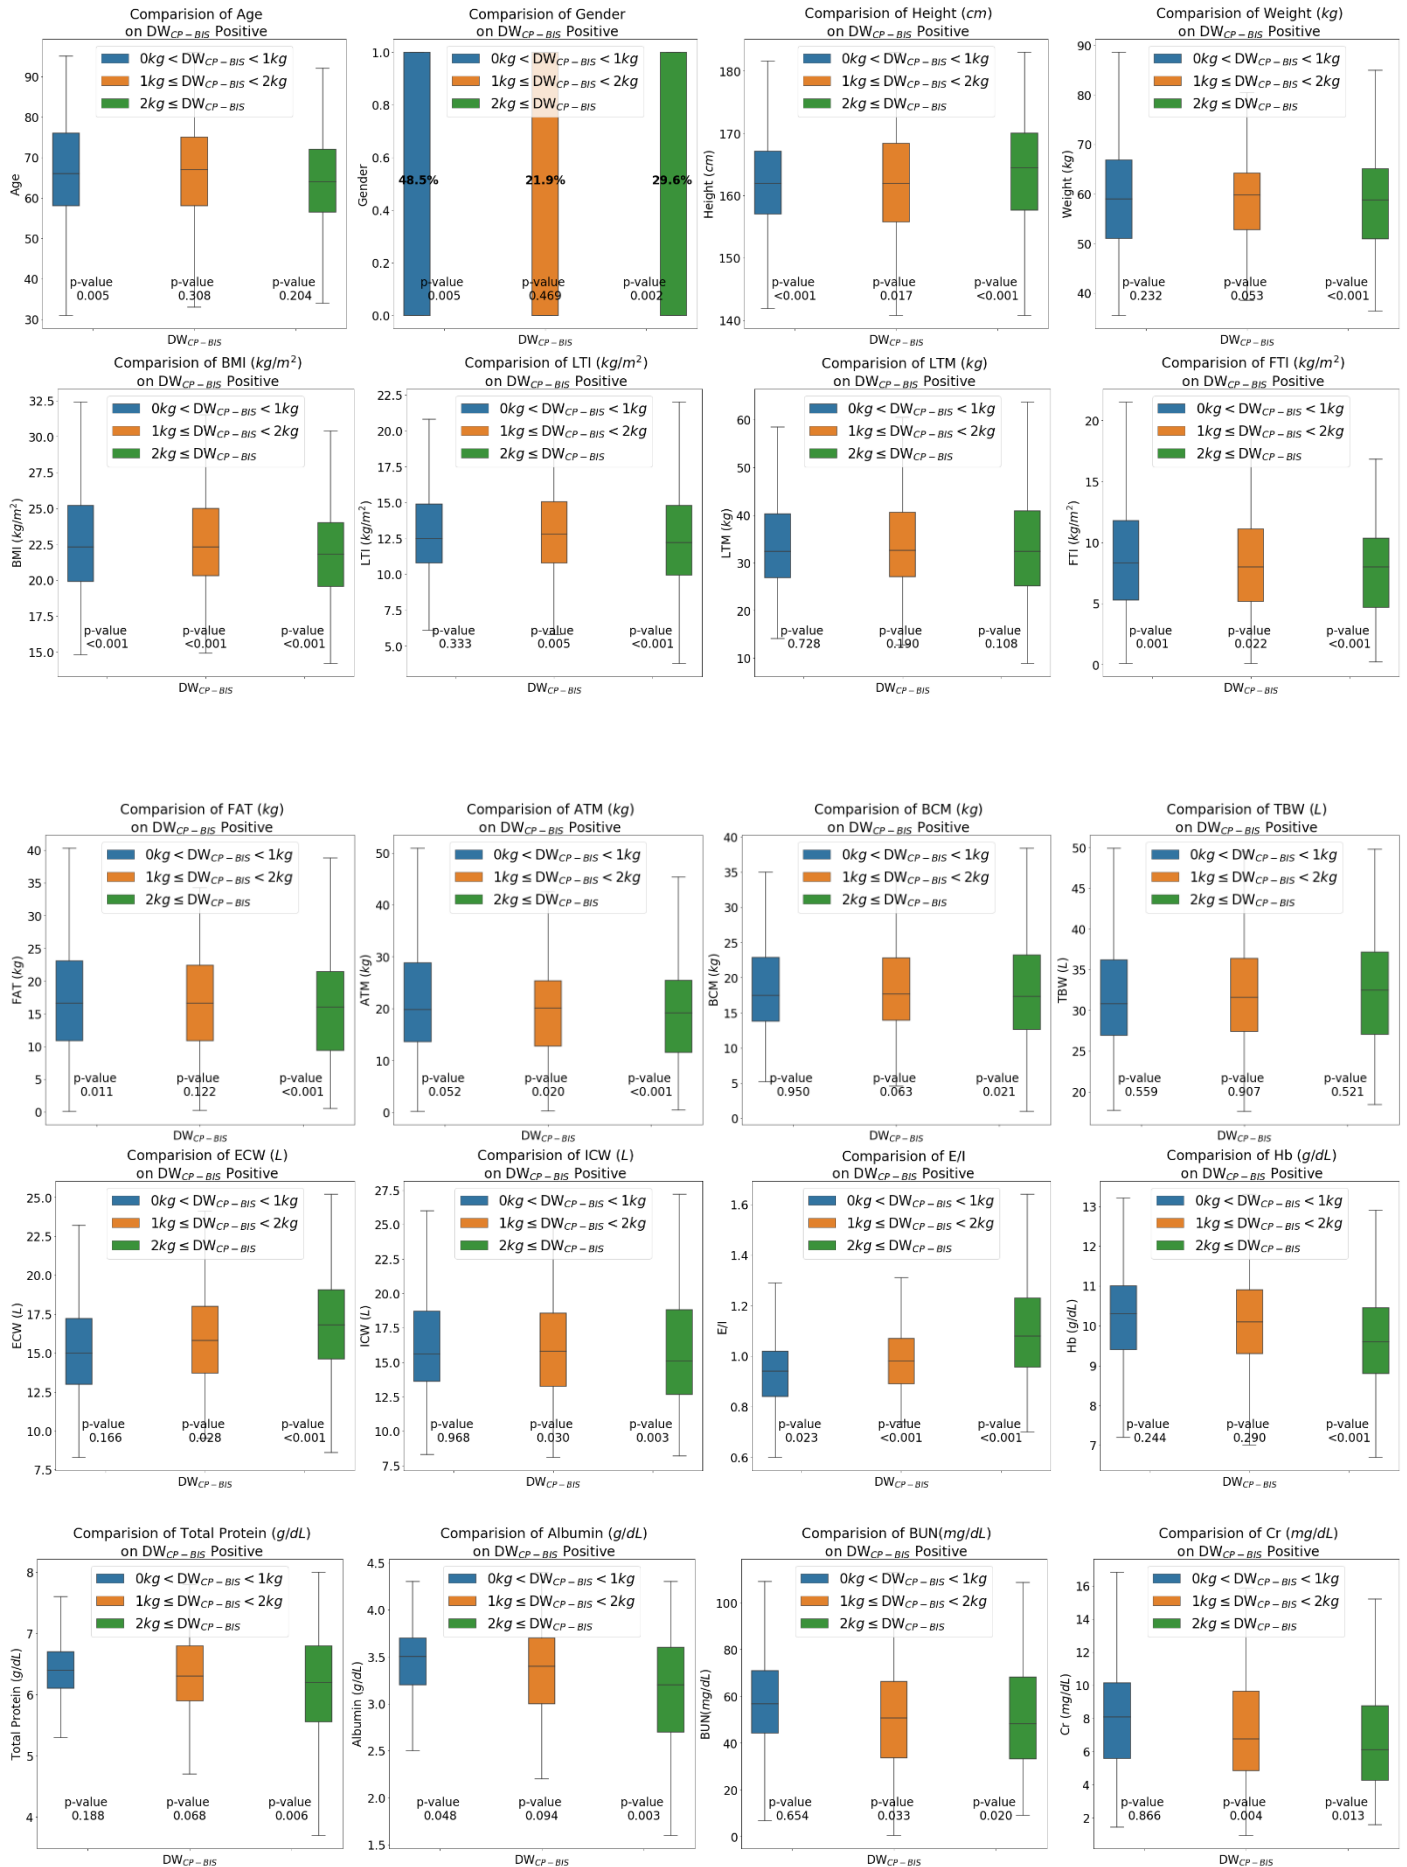

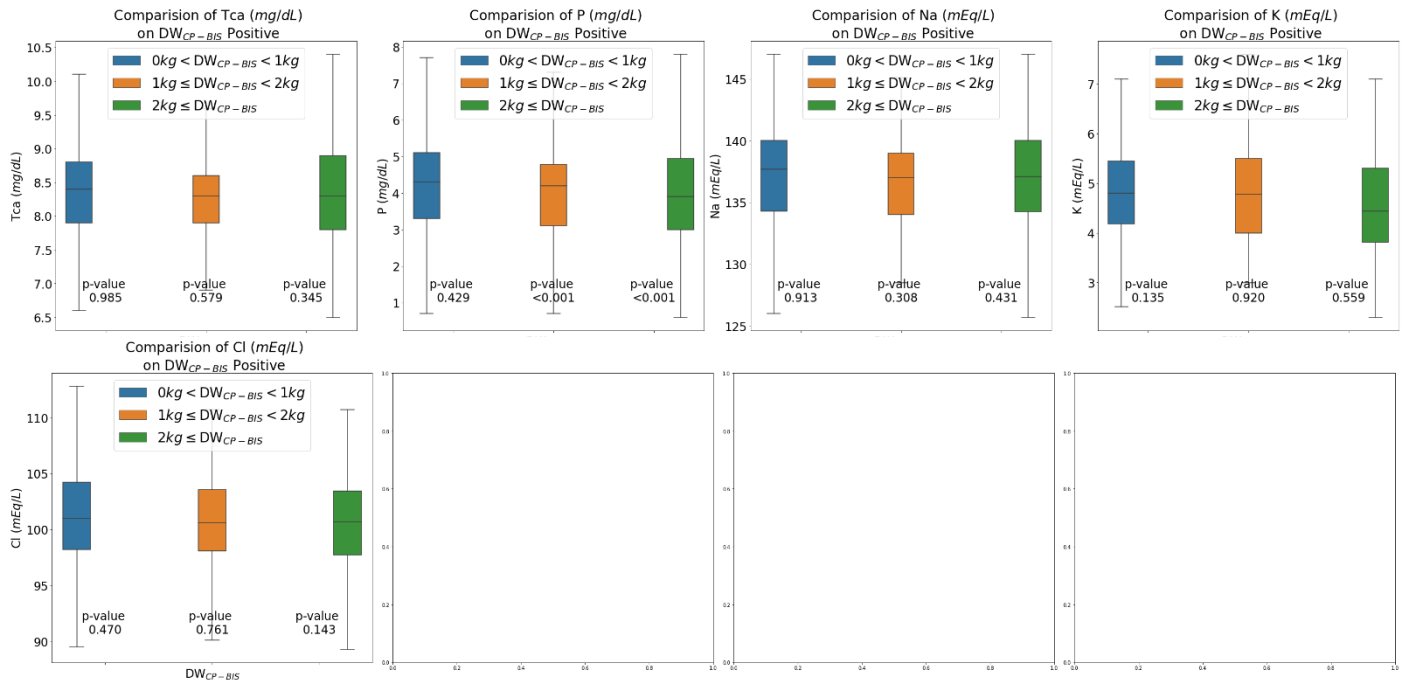

**B**

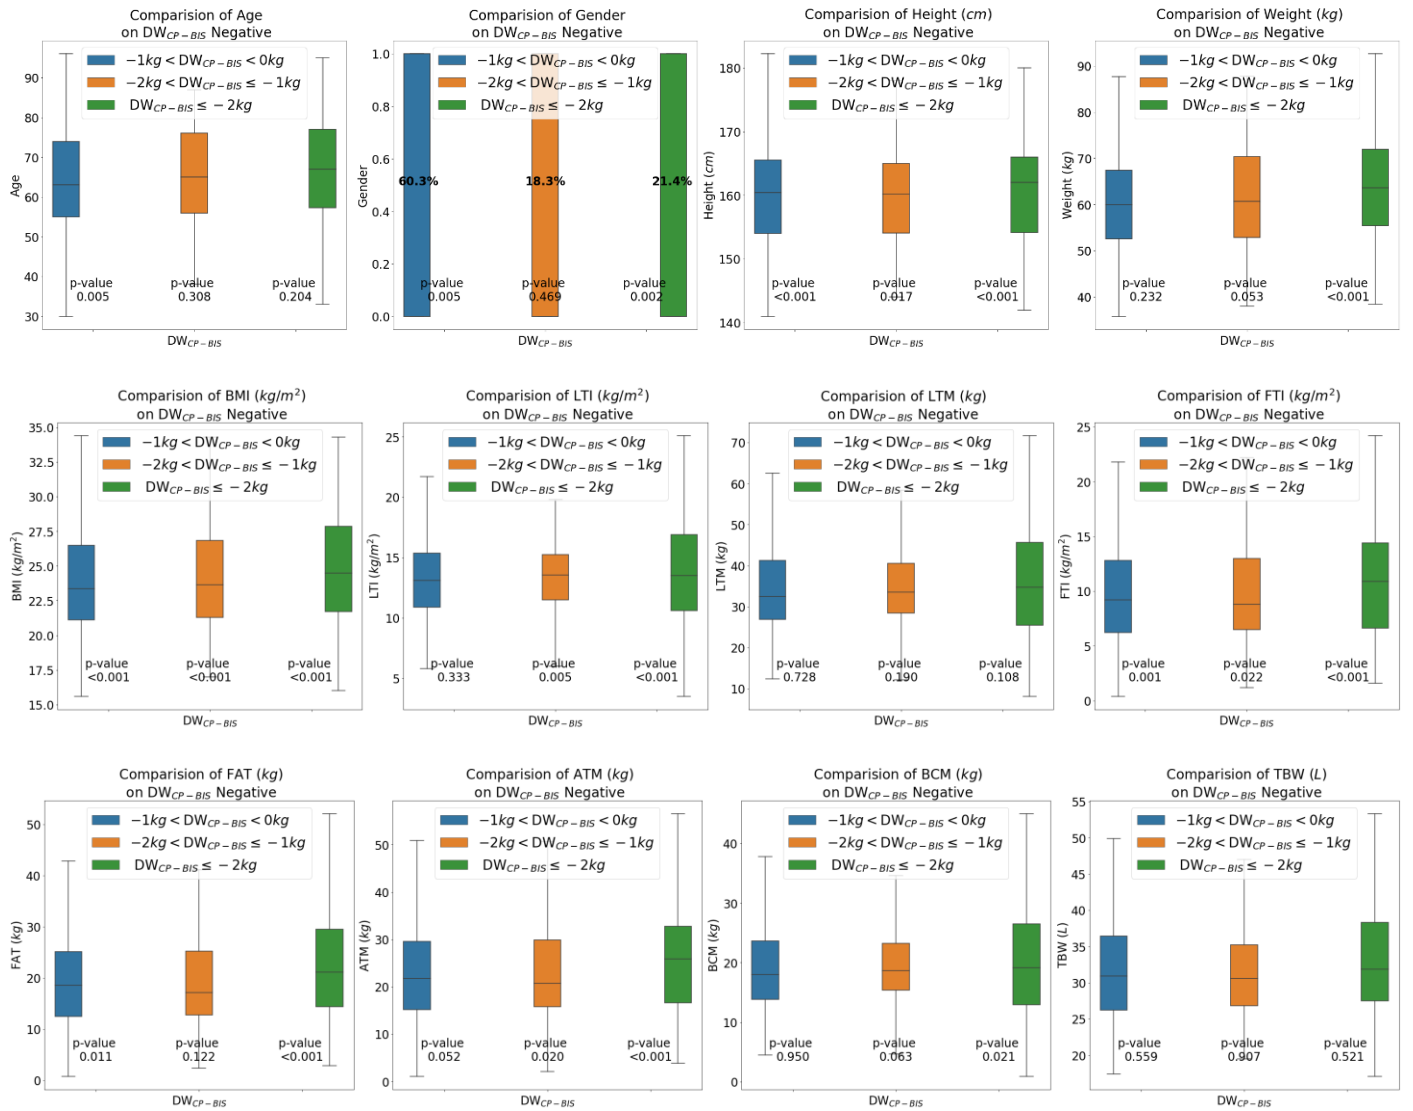

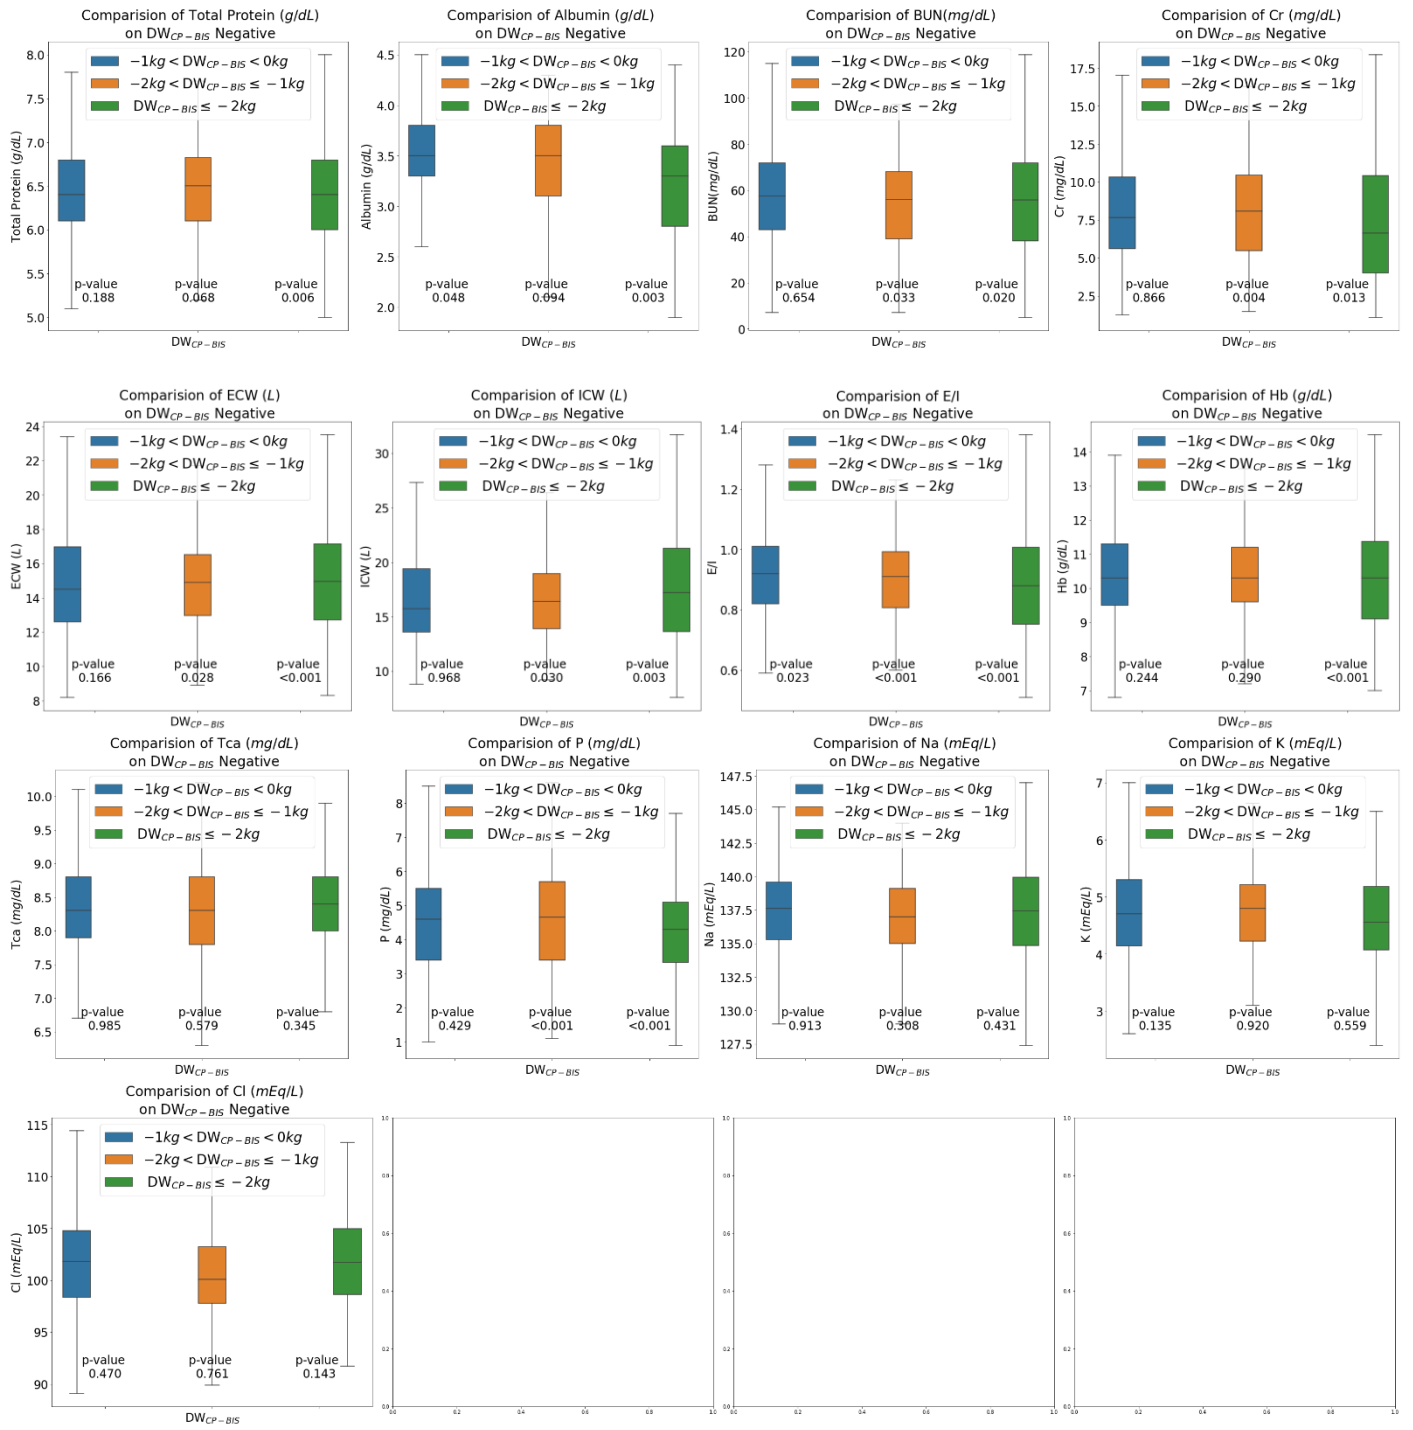

**Figure S1.** (A) Clinical Parameters as degrees of differences in Positive DWCP-BIS groups. (B) Clinical Parameters as degrees of differences in Negative DWCP-BIS groups.

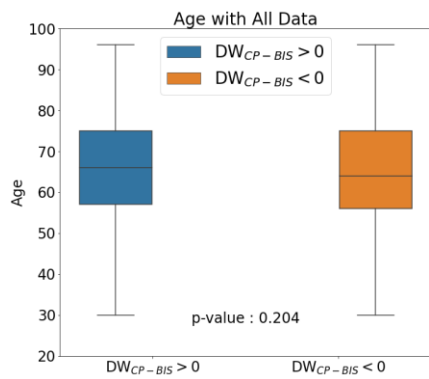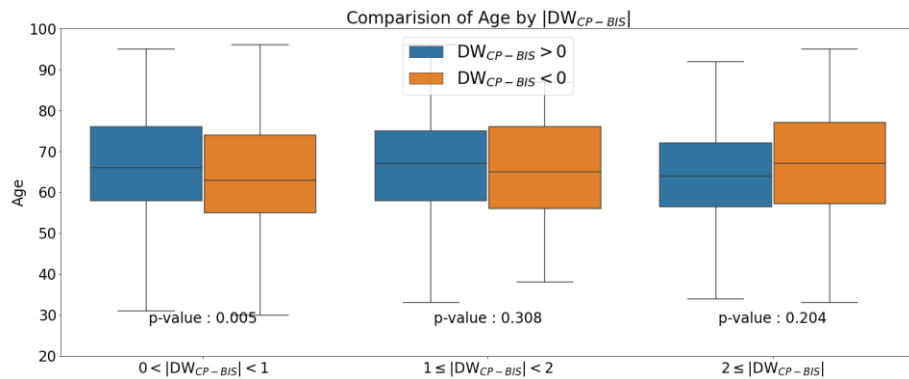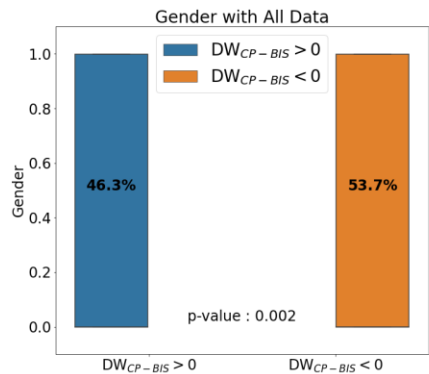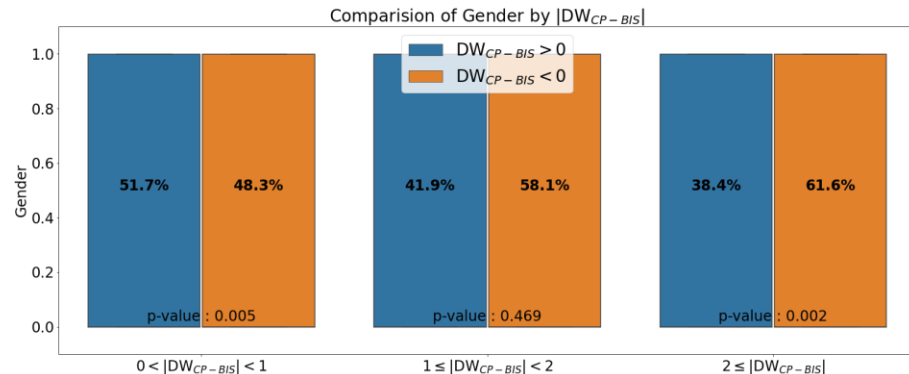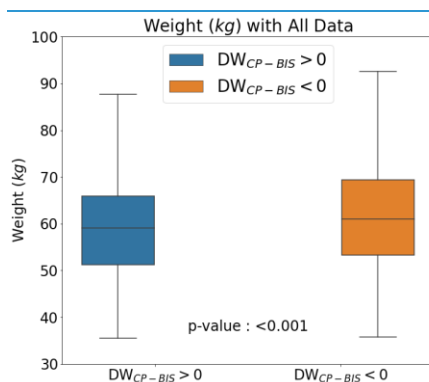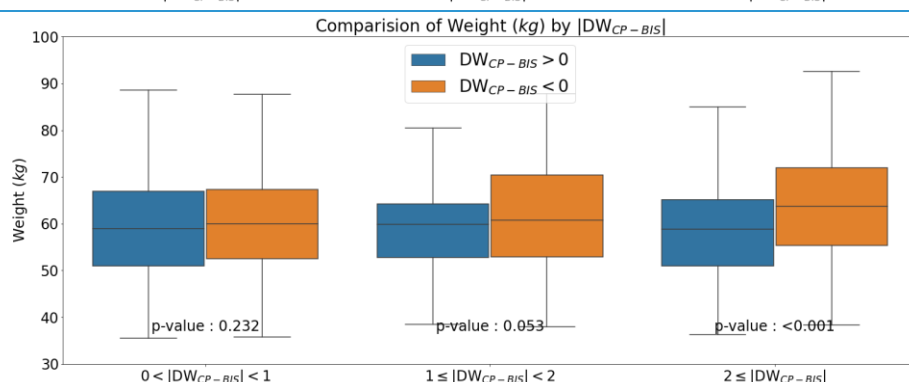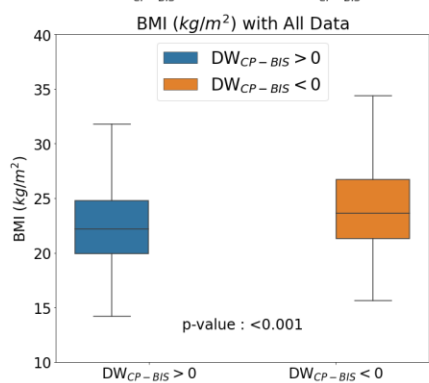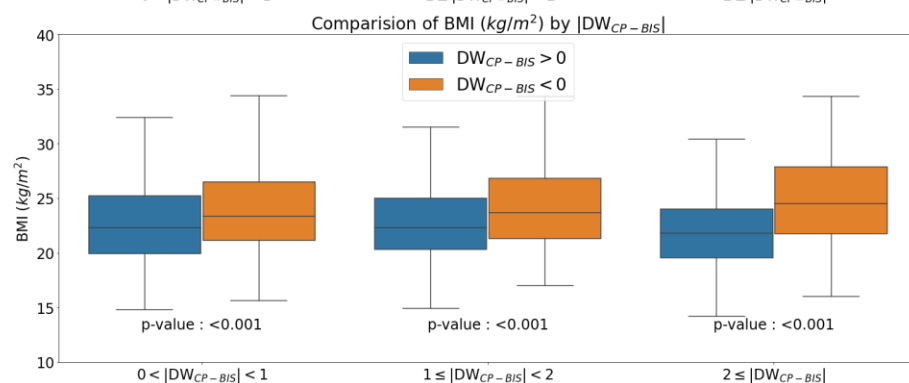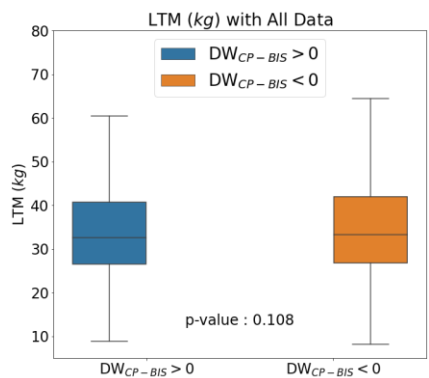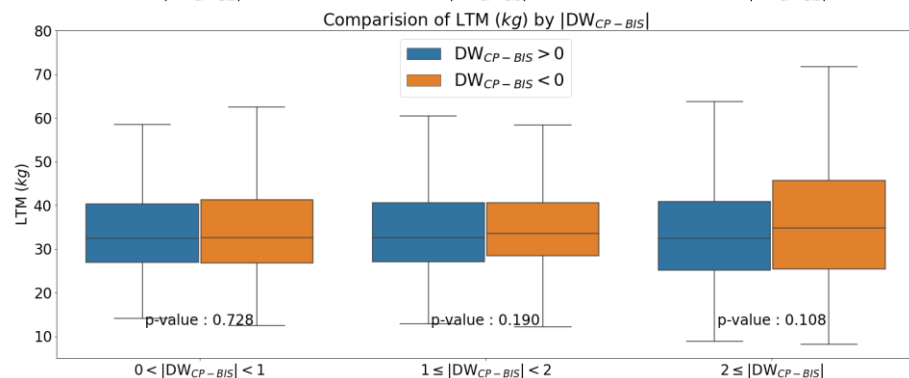

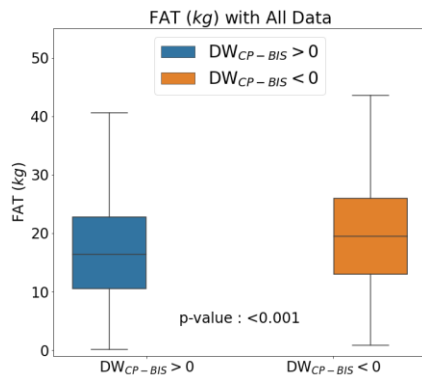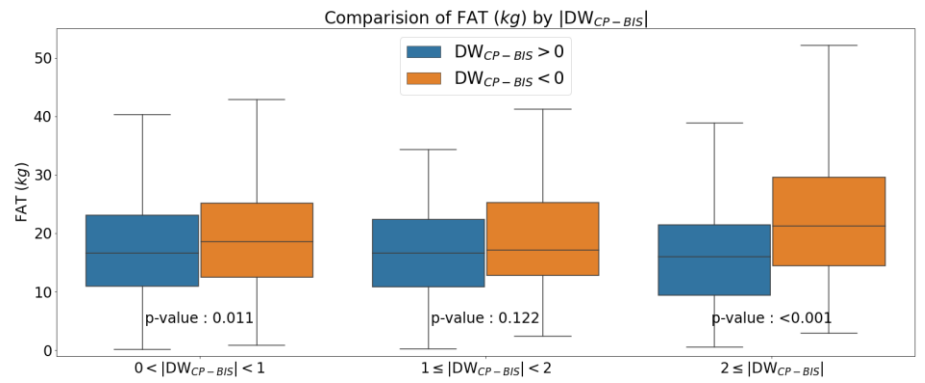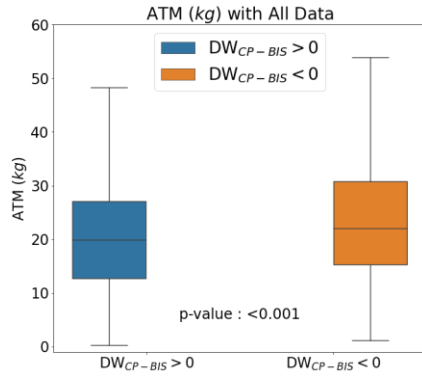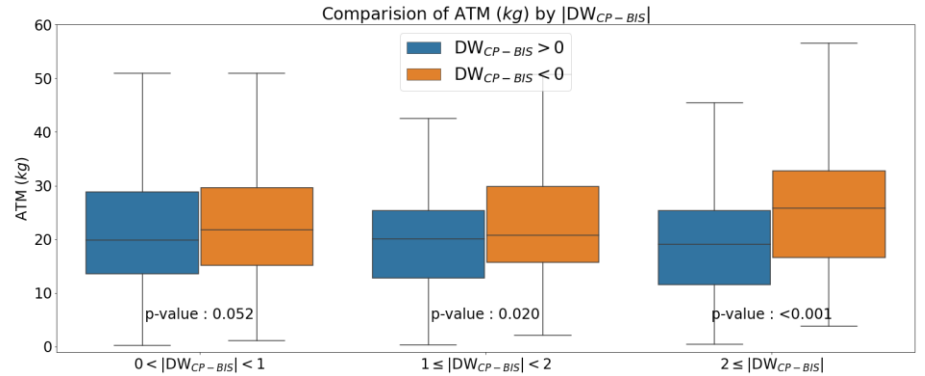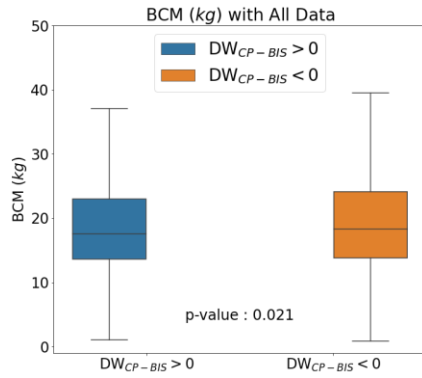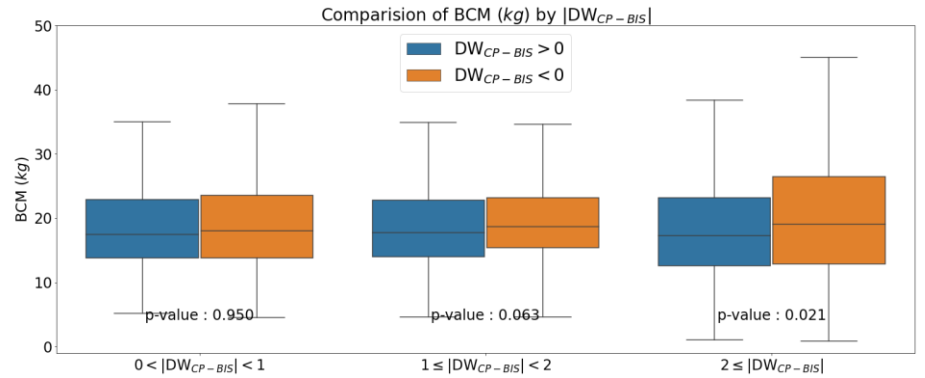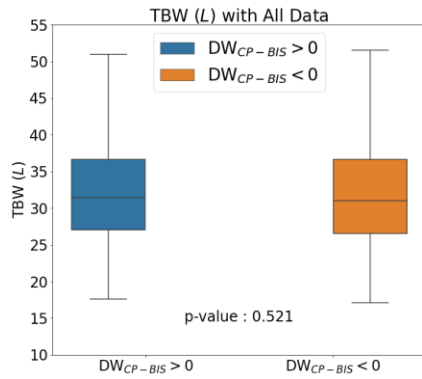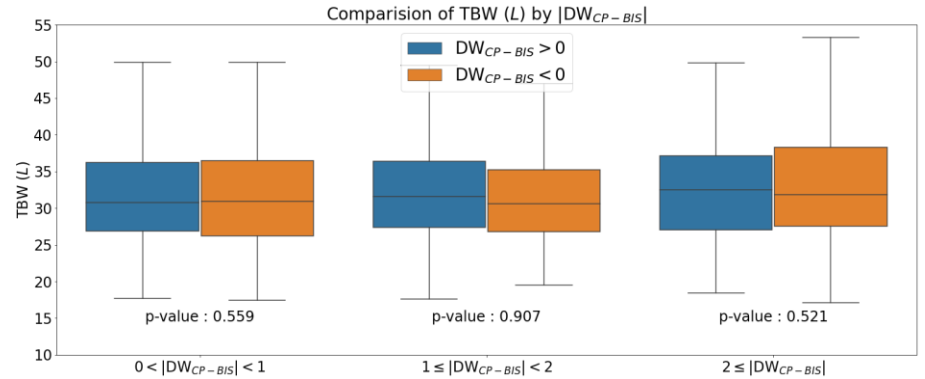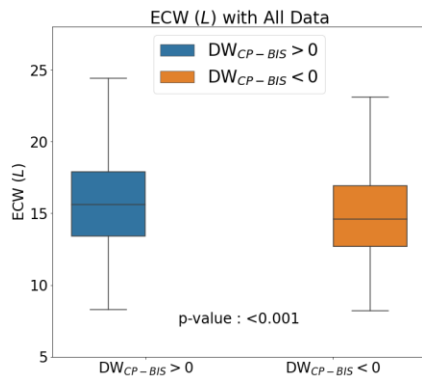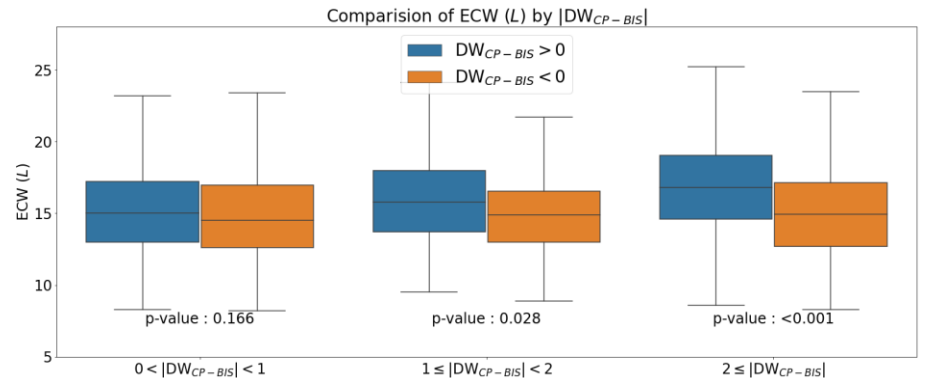



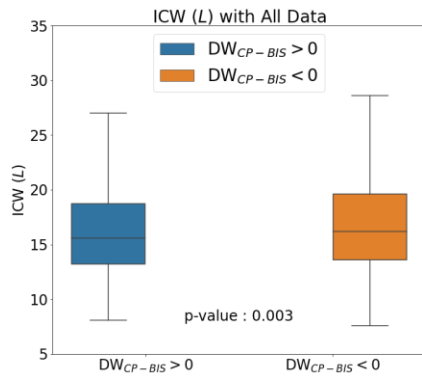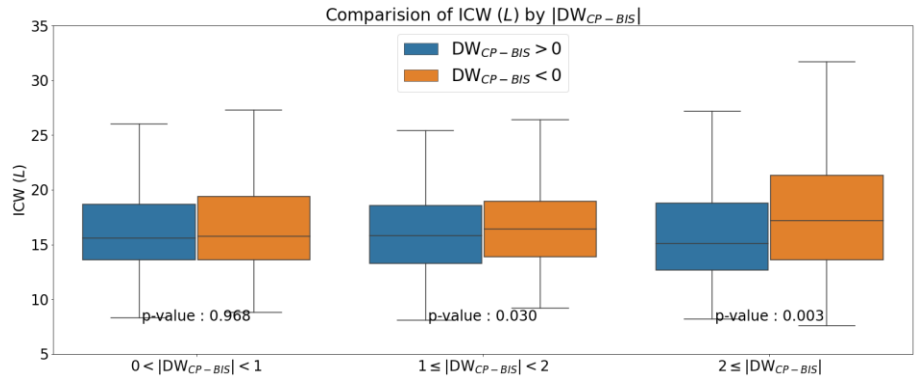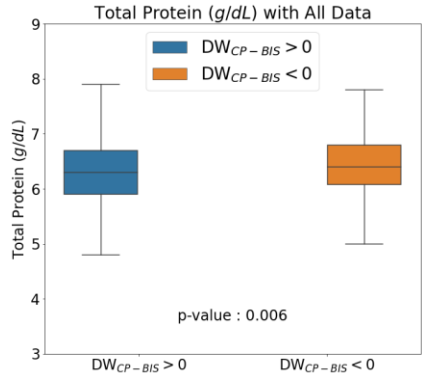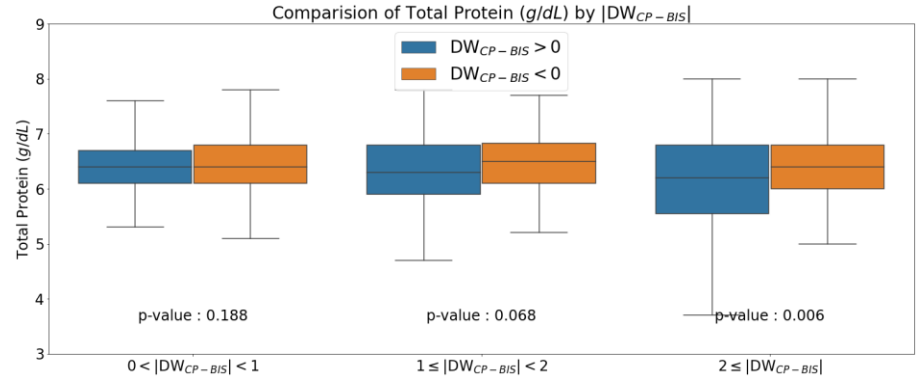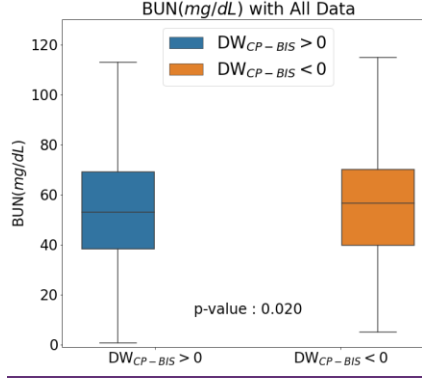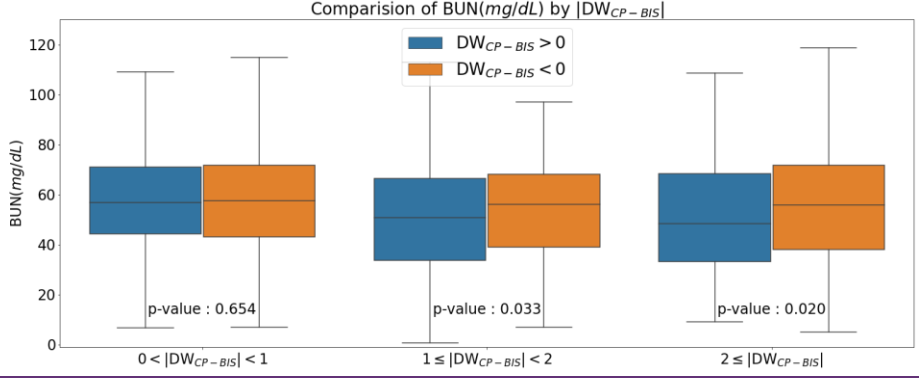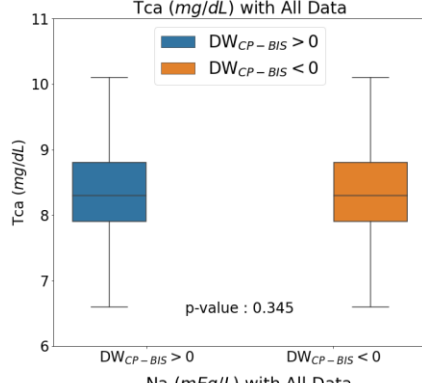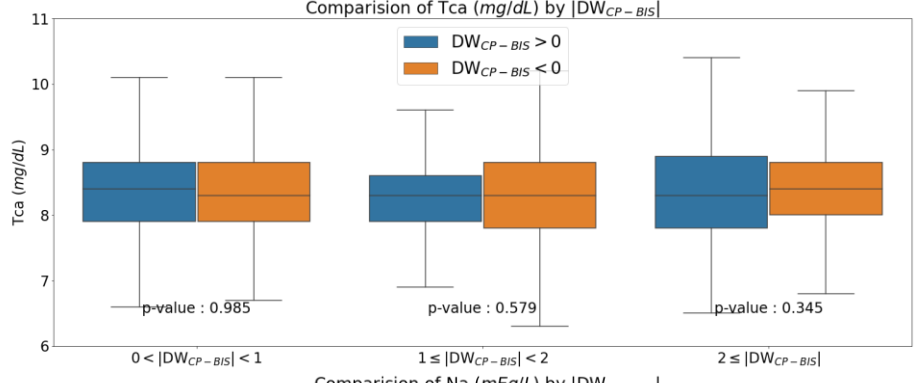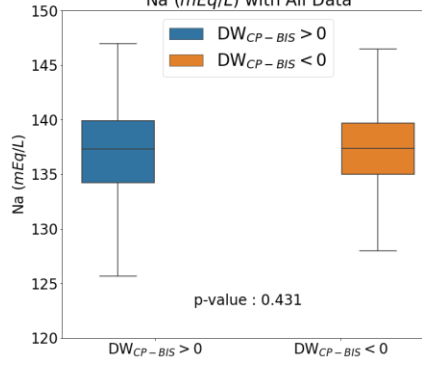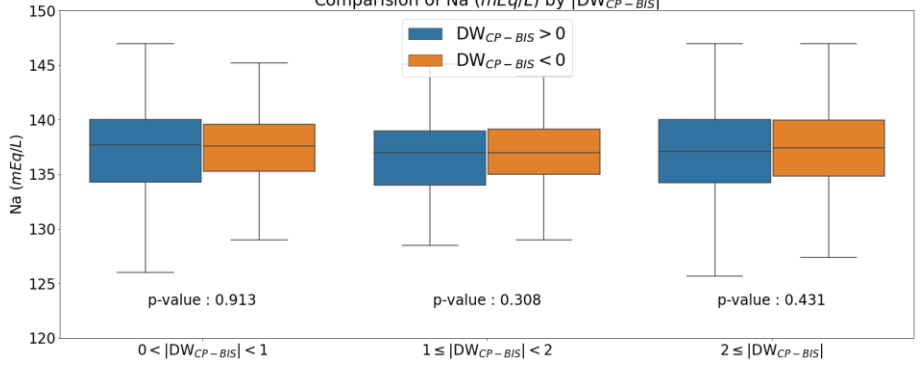

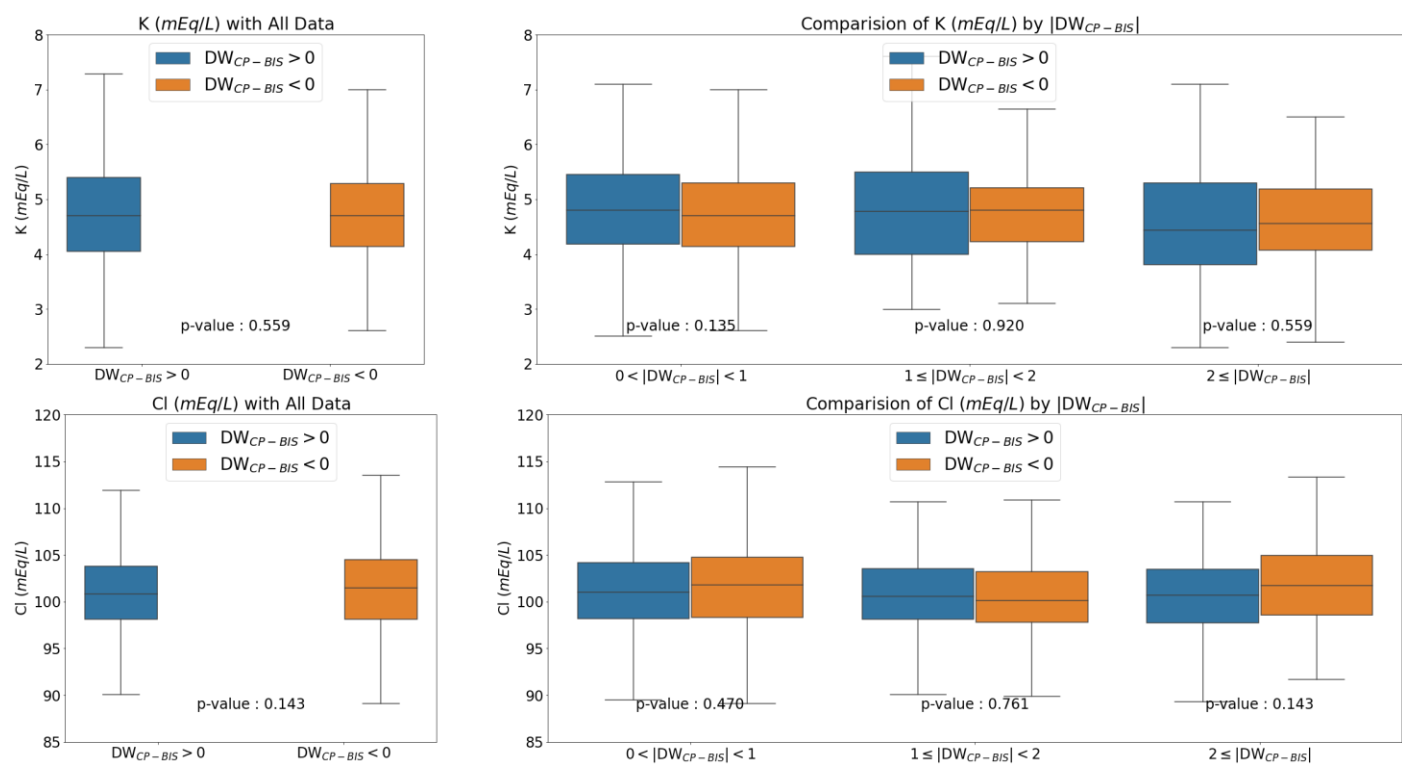

**Figure S2.** Comparison of clinical parameter by differences of  $DW_{CP-BIS}$ .
